# Supplementary material for: A facile synthesis, structural morphology and fluorescent properties of cross-linked poly(cyclotriphosphazene-co-1,3,5-tri(4-hydroxyphenyl)benzene) hybrid copolymer microspheres
Source: Royal Society of Chemistry journal article supplement (doi:10.1039/c6nj01578f), 2016-01-01
Supplement: c6nj01578f1.pdf [file c6nj01578f1.pdf]

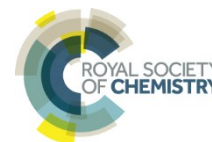

Journal Name

ARTICLE

## Supporting information

### A facile synthesis, structural morphology and fluorescent properties of cross-linked poly(cyclotriphosphazene-co-1,3,5-tri(4-hydroxyphenyl)benzene) hybrid copolymer microspheres

Received 00th January 20xx,  
Accepted 00th January 20xx

DOI: 10.1039/x0xx00000x

[www.rsc.org/](http://www.rsc.org/)

Sami Ullah Dar,<sup>a</sup> Shafqat Ali,<sup>a</sup> Muhammad Usman Hameed,<sup>a</sup> Zareen Zuhra<sup>b</sup> and Zhanpeng Wu<sup>a,\*</sup>

## Figure caption

**Fig. S1** SEM image of PCTHB microspheres at concentration of HPB of 3 mM while HCCP (1 mM) concentration kept constant

**Fig. S2** Particle size distribution of PCTHB microspheres at different concentrations of HCCP 0.5  $\mu\text{m}$  and 0.5  $\text{g l}^{-1}$  (a), 0.7  $\mu\text{m}$  and 1.0  $\text{g l}^{-1}$  (b), 0.9  $\mu\text{m}$  and 2.0  $\text{g l}^{-1}$  (c), 1.1  $\mu\text{m}$  and 4.0  $\text{g l}^{-1}$  (d)

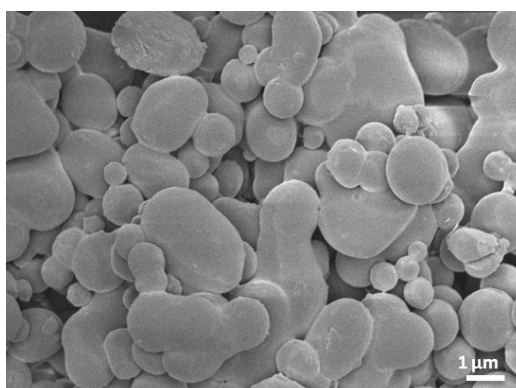

**Fig. S1** SEM image of PCTHB microspheres at concentration of HPB of 3 mM while HCCP (1 mM) concentration kept constant

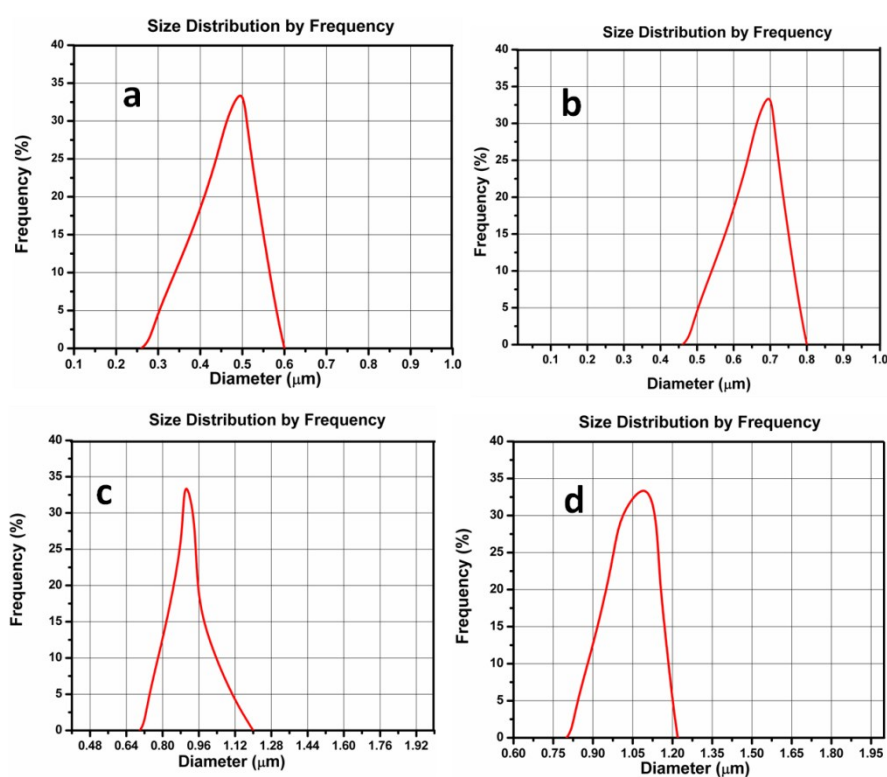

**Fig. S2** Particle size distribution of PCTHB microspheres at different concentrations of HCCP 0.5 μm and 0.5 g l<sup>-1</sup> (a), 0.7 μm and 1.0 g l<sup>-1</sup> (b), 0.9 μm and 2.0 g l<sup>-1</sup> (c), 1.1 μm and 4.0 g l<sup>-1</sup> (d)
